# Supplementary material
Source: PubMed Central journal article supplement (PMC4896223)
Supplement: NIHMS745566-supplement-Supplemental_Digital_Content_to_Be_Published_2.pdf [file NIHMS745566-supplement-Supplemental_Digital_Content_to_Be_Published_2.pdf]

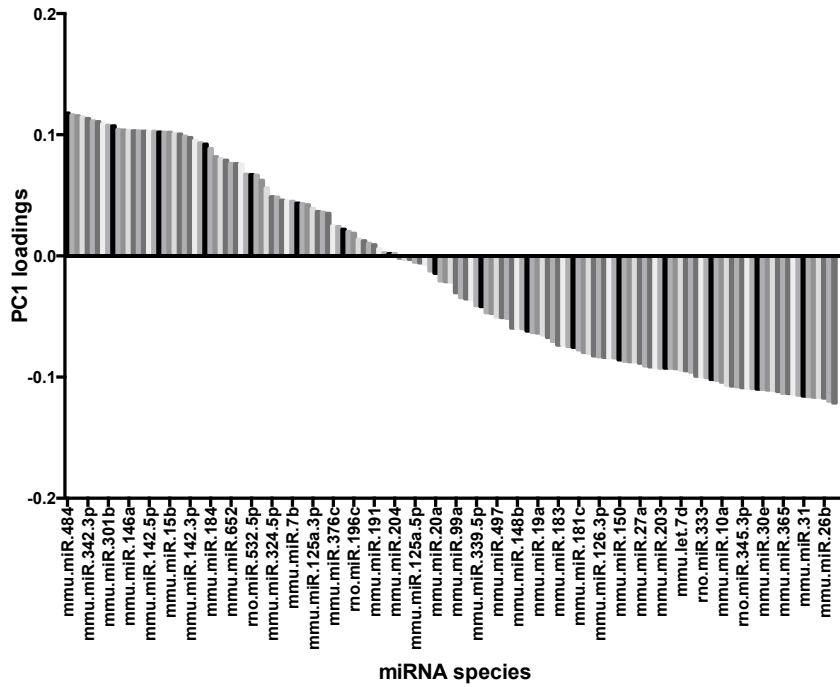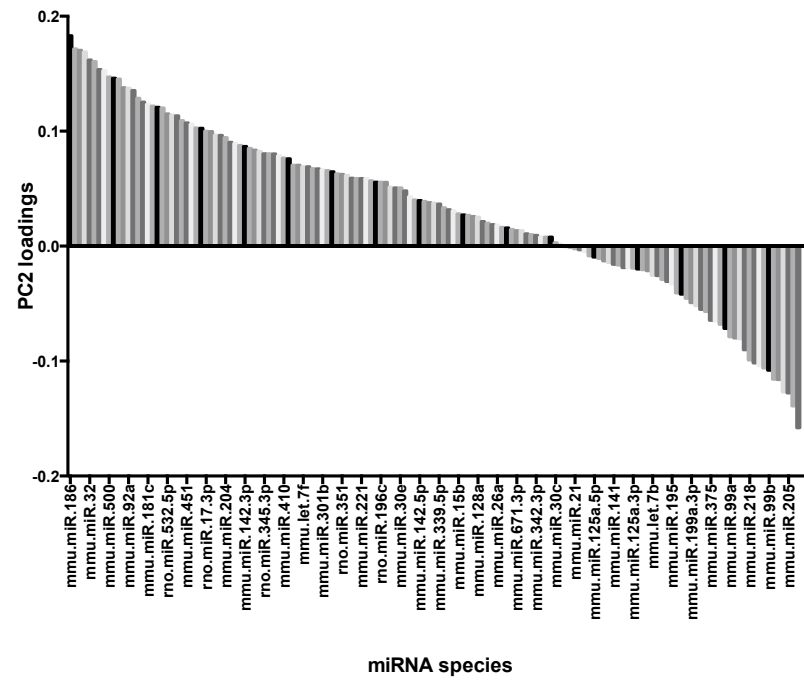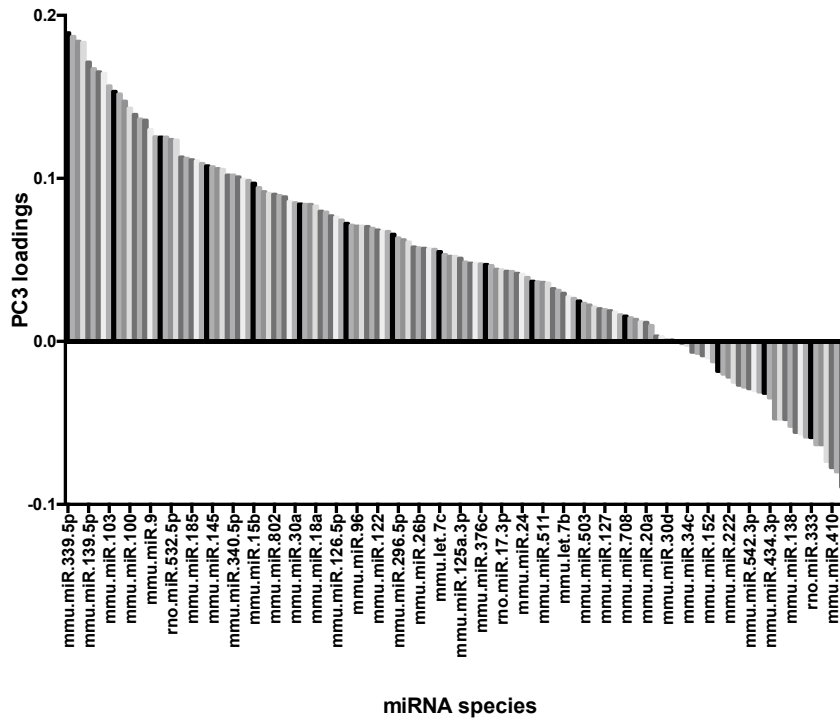

**Supplementary Figure 2:** The principal component loadings (influences) for all of the miRNA with a full compliment of data (n=151) used in the principal component analysis for the first three principal components.
