# Supplementary material
Source: PubMed Central journal article supplement (PMC4896223)
Supplement: NIHMS745566-supplement-Supplemental_Table_1.pdf [file NIHMS745566-supplement-Supplemental_Table_1.pdf]

## Supplementary Digital Content

**Supplementary Table 1:** 158 Murine ortholog and rat miRNA's investigated for differential alteration in total lymphoid irradiation protocol treated orthotopic rat liver transplant model, compared to allogeneic and syngeneic controls

|                 |                 |                |                |                |
|-----------------|-----------------|----------------|----------------|----------------|
| mmu-let-7b      | mmu-miR-15b     | mmu-miR-27b    | mmu-miR-451    | rno-miR-345-3p |
| mmu-let-7a      | mmu-miR-16      | mmu-miR-28     | mmu-miR-484    | rno-miR-351    |
| mmu-let-7c      | mmu-miR-17      | mmu-miR-296-5p | mmu-miR-495    | rno-miR-381    |
| mmu-let-7d      | mmu-miR-181a    | mmu-miR-29a    | mmu-miR-497    | rno-miR-450a   |
| mmu-let-7e      | mmu-miR-181c    | mmu-miR-29b    | mmu-miR-499    | rno-miR-466c   |
| mmu-let-7f      | mmu-miR-182     | mmu-miR-29c    | mmu-miR-500    | rno-miR-505    |
| mmu-let-7i      | mmu-miR-183     | mmu-miR-301a   | mmu-miR-503    | rno-miR-532-5p |
| mmu-miR-100     | mmu-miR-184     | mmu-miR-301b   | mmu-miR-511    |                |
| mmu-miR-101a    | mmu-miR-185     | mmu-miR-30a    | mmu-miR-532-3p | RNU6           |
| mmu-miR-103     | mmu-miR-186     | mmu-miR-30b    | mmu-miR-539    |                |
| mmu-miR-106b    | mmu-miR-18a     | mmu-miR-30c    | mmu-miR-542-3p |                |
| mmu-miR-107     | mmu-miR-190     | mmu-miR-30d    | mmu-miR-542-5p |                |
| mmu-miR-10a     | mmu-miR-191     | mmu-miR-30e    | mmu-miR-582-5p |                |
| mmu-miR-122     | mmu-miR-192     | mmu-miR-31     | mmu-miR-598    |                |
| mmu-miR-125a-3p | mmu-miR-193     | mmu-miR-32     | mmu-miR-652    |                |
| mmu-miR-125a-5p | mmu-miR-194     | mmu-miR-320    | mmu-miR-667    |                |
| mmu-miR-125b-5p | mmu-miR-195     | mmu-miR-322    | mmu-miR-671-3p |                |
| mmu-miR-126-3p  | mmu-miR-196b    | mmu-miR-324-5p | mmu-miR-672    |                |
| mmu-miR-126-5p  | mmu-miR-199a-3p | mmu-miR-328    | mmu-miR-674    |                |
| mmu-miR-127     | mmu-miR-199a-5p | mmu-miR-331-3p | mmu-miR-685    |                |
| mmu-miR-128a    | mmu-miR-19a     | mmu-miR-335-5p | mmu-miR-708    |                |
| mmu-miR-130a    | mmu-miR-19b     | mmu-miR-339-5p | mmu-miR-7a     |                |
| mmu-miR-130b    | mmu-miR-200a    | mmu-miR-340-5p | mmu-miR-7b     |                |
| mmu-miR-132     | mmu-miR-203     | mmu-miR-342-3p | mmu-miR-802    |                |
| mmu-miR-133a    | mmu-miR-204     | mmu-miR-34a    | mmu-miR-872    |                |
| mmu-miR-135a    | mmu-miR-205     | mmu-miR-34c    | mmu-miR-9      |                |
| mmu-miR-135b    | mmu-miR-20a     | mmu-miR-361    | mmu-miR-92a    |                |
| mmu-miR-138     | mmu-miR-21      | mmu-miR-363    | mmu-miR-93     |                |
| mmu-miR-139-5p  | mmu-miR-210     | mmu-miR-365    | mmu-miR-96     |                |
| mmu-miR-140     | mmu-miR-215     | mmu-miR-375    | mmu-miR-99a    |                |
| mmu-miR-141     | mmu-miR-218     | mmu-miR-376a   | mmu-miR-99b    |                |
| mmu-miR-142-3p  | mmu-miR-219     | mmu-miR-376c   | rno-miR-1      |                |
| mmu-miR-142-5p  | mmu-miR-221     | mmu-miR-379    | rno-miR-17-3p  |                |
| mmu-miR-145     | mmu-miR-222     | mmu-miR-384-5p | rno-miR-190b   |                |
| mmu-miR-146a    | mmu-miR-23b     | mmu-miR-410    | rno-miR-196c   |                |
| mmu-miR-147     | mmu-miR-24      | mmu-miR-411    | rno-miR-207    |                |
| mmu-miR-148b    | mmu-miR-25      | mmu-miR-425    | rno-miR-20b-3p |                |
| mmu-miR-150     | mmu-miR-26a     | mmu-miR-429    | rno-miR-224    |                |
| mmu-miR-151-3p  | mmu-miR-26b     | mmu-miR-434-3p | rno-miR-333    |                |
| mmu-miR-152     | mmu-miR-27a     | mmu-miR-449a   | rno-miR-339-3p |                |
